# Supplementary material for: Rate and predictors for non-attendance of patients undergoing hospital outpatient treatment for chronic diseases: a register-based cohort study
Source: Springer Nature journal article supplement (doi:10.1186/s12913-019-4208-9), 2019-06-14
Supplement: MOESM1 [file 16813942]

**Additional file 1: Characteristics of patients with full attendance (attenders) and partial attendance (non-attenders) during the two year study period (n = 5,895 patients)**

| Variable                        | Total |      | Attenders |      | Non-attenders |      | p-value <sup>1</sup> |
|---------------------------------|-------|------|-----------|------|---------------|------|----------------------|
|                                 | n     | %    | n         | %    | n             | %    |                      |
| <b>Overall</b>                  | 5,895 | 100% | 3,838     | 100% | 2,057         | 100% |                      |
| <b>Age</b>                      |       |      |           |      |               |      | <0.001               |
| 18-29                           | 206   | 3%   | 74        | 2%   | 132           | 6%   |                      |
| 30-39                           | 383   | 6%   | 192       | 5%   | 191           | 9%   |                      |
| 40-49                           | 778   | 13%  | 426       | 11%  | 352           | 17%  |                      |
| 50-59                           | 1,183 | 20%  | 750       | 20%  | 433           | 21%  |                      |
| 60-69                           | 1,700 | 29%  | 1,222     | 32%  | 478           | 23%  |                      |
| 70-79                           | 1,251 | 21%  | 894       | 23%  | 357           | 17%  |                      |
| 80+                             | 394   | 7%   | 280       | 7%   | 114           | 6%   |                      |
| <b>Gender</b>                   |       |      |           |      |               |      | <0.001               |
| male                            | 2,959 | 50%  | 1,833     | 48%  | 1,126         | 55%  |                      |
| female                          | 2,936 | 50%  | 2,005     | 52%  | 931           | 45%  |                      |
| <b>Marital status</b>           |       |      |           |      |               |      | <0.001               |
| Unmarried                       | 2,519 | 43%  | 1,515     | 39%  | 1,004         | 49%  |                      |
| Married                         | 3,376 | 57%  | 2,323     | 61%  | 1,053         | 51%  |                      |
| <b>Educational level</b>        |       |      |           |      |               |      | 0.003                |
| Basic (primary school)          | 2,351 | 40%  | 1,500     | 39%  | 851           | 41%  |                      |
| Vocational or upper secondary   | 2,345 | 40%  | 1,550     | 40%  | 795           | 39%  |                      |
| Further or higher education     | 1,054 | 18%  | 711       | 19%  | 343           | 17%  |                      |
| Unknown                         | 145   | 2%   | 77        | 2%   | 68            | 3%   |                      |
| <b>Occupational status</b>      |       |      |           |      |               |      | <0.001               |
| Student                         | 63    | 1%   | 29        | 1%   | 34            | 2%   |                      |
| Affiliated to labour market     | 1,838 | 31%  | 1,138     | 30%  | 700           | 34%  |                      |
| Short-term welfare payment      | 125   | 2%   | 61        | 2%   | 64            | 3%   |                      |
| Long-term welfare payment       | 200   | 3%   | 88        | 2%   | 112           | 5%   |                      |
| Disability pension              | 718   | 12%  | 411       | 11%  | 307           | 15%  |                      |
| Pension                         | 2,896 | 49%  | 2,086     | 54%  | 810           | 39%  |                      |
| Unknown                         | 55    | 1%   | 25        | 1%   | 30            | 1%   |                      |
| <b>Specific chronic disease</b> |       |      |           |      |               |      |                      |
| <b>Type 1 diabetes mellitus</b> |       |      |           |      |               |      | <0.001               |
| yes                             | 1,144 | 19%  | 657       | 17%  | 487           | 24%  |                      |
| no                              | 4,751 | 81%  | 3,181     | 83%  | 1,570         | 76%  |                      |
| <b>Type 2 diabetes mellitus</b> |       |      |           |      |               |      | 0.01                 |
| yes                             | 2,281 | 39%  | 1,439     | 37%  | 842           | 41%  |                      |
| no                              | 3,614 | 61%  | 2,399     | 63%  | 1,215         | 59%  |                      |

|                                               |            |       |     |       |     |       |     |        |
|-----------------------------------------------|------------|-------|-----|-------|-----|-------|-----|--------|
| <b>Hearth failure</b>                         |            |       |     |       |     |       |     | 0.09   |
|                                               | <b>yes</b> | 287   | 5%  | 200   | 5%  | 87    | 4%  |        |
|                                               | <b>no</b>  | 5,608 | 95% | 3,638 | 95% | 1,970 | 96% |        |
| <b>COPD</b>                                   |            |       |     |       |     |       |     | 0.5    |
|                                               | <b>yes</b> | 425   | 7%  | 283   | 7%  | 142   | 7%  |        |
|                                               | <b>no</b>  | 5,470 | 93% | 3,555 | 93% | 1,915 | 93% |        |
| <b>Asthma</b>                                 |            |       |     |       |     |       |     | 0.73   |
|                                               | <b>yes</b> | 454   | 8%  | 299   | 8%  | 155   | 8%  |        |
|                                               | <b>no</b>  | 5,441 | 92% | 3,539 | 92% | 1,902 | 92% |        |
| <b>Rheumatorid arthritis</b>                  |            |       |     |       |     |       |     | 0.18   |
|                                               | <b>yes</b> | 752   | 13% | 473   | 12% | 279   | 14% |        |
|                                               | <b>no</b>  | 5,143 | 87% | 3,365 | 88% | 1,778 | 86% |        |
| <b>Osteoporosis</b>                           |            |       |     |       |     |       |     | <0.001 |
|                                               | <b>yes</b> | 688   | 12% | 562   | 15% | 126   | 6%  |        |
|                                               | <b>no</b>  | 5,207 | 88% | 3,276 | 85% | 1,931 | 94% |        |
| <b>Number of outpatient treatment courses</b> |            |       |     |       |     |       |     | 0.02   |
|                                               | <b>1</b>   | 5,760 | 98% | 3,763 | 98% | 1,997 | 97% |        |
|                                               | <b>2+</b>  | 135   | 2%  | 75    | 2%  | 60    | 3%  |        |

---

<sup>1</sup> Chi-square test between attenders and non-attenders
